# Supplementary material for: Fingolimod (FTY720-P) Does Not Stabilize the Blood–Brain Barrier under Inflammatory Conditions in an in Vitro Model
Source: MDPI journal article supplement (doi:10.3390/ijms161226177), 2015-12-10
Supplement: s1 [file s1]

# Supplementary Materials: Fingolimod (FTY720-P) Does Not Stabilize the Blood–Brain Barrier under Inflammatory Conditions in an *in Vitro* Model

Michael K. Schuhmann, Stefan Bittner, Sven G. Meuth, Christoph Kleinschnitz and Felix Fluri

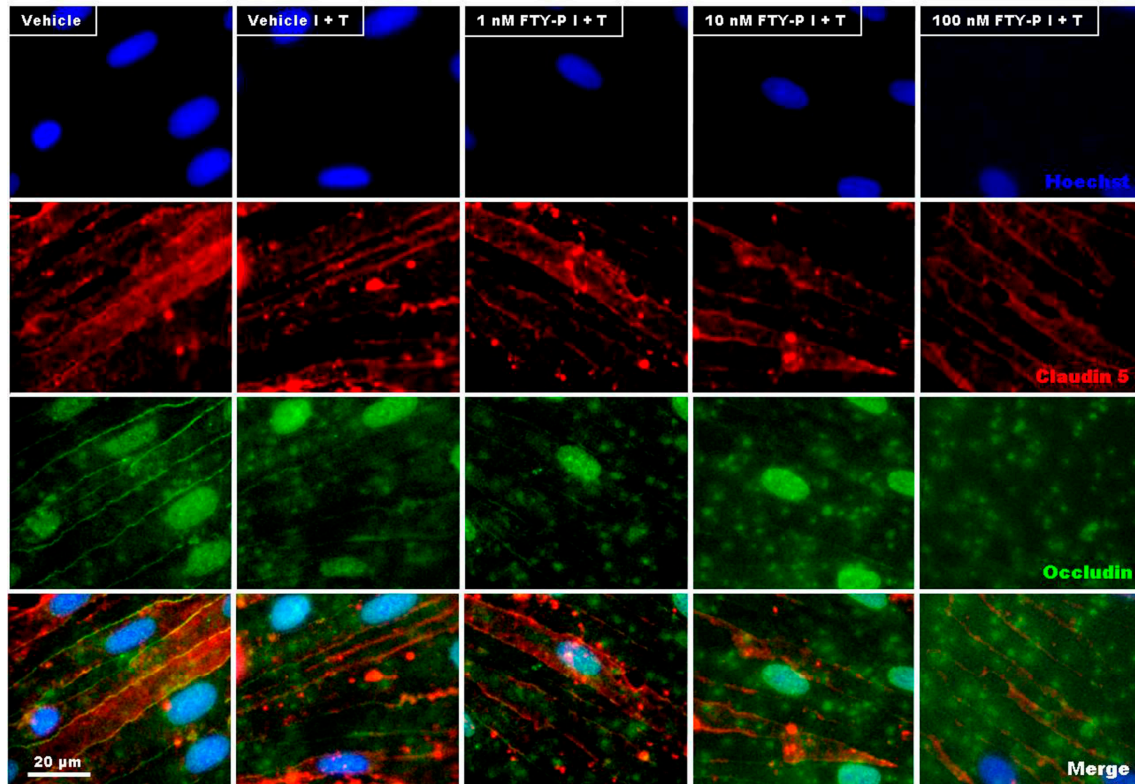

**Figure S1.** RBMEC immunofluorescence staining against Hoechst (blue), claudin 5 (red), and occludin (green) 18 h after exposure to interferon  $\gamma$  and tumor necrosis factor  $\alpha$  (I + T; 100 IU each) and FTY720-P treatment.

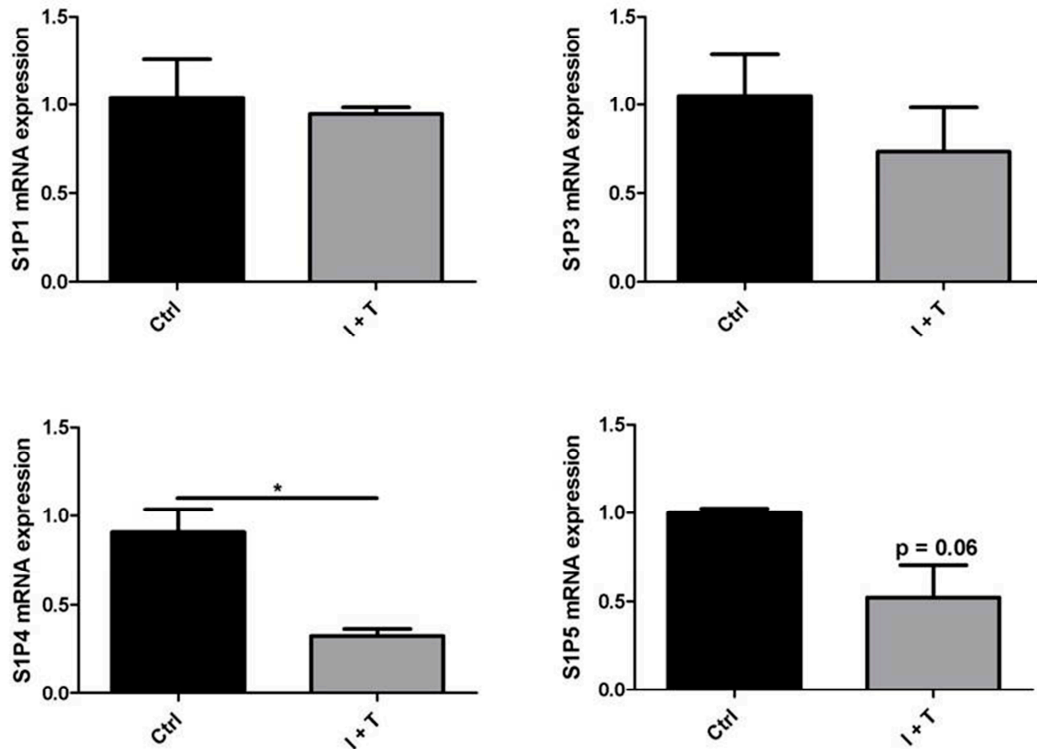

**Figure S2.** RT-PCR analysis of S1P<sub>1</sub>, S1P<sub>3</sub>, S1P<sub>4</sub>, and S1P<sub>5</sub> –receptor ( $n = 3$ ) mRNA expression (normalized to Ctrl) in rat brain microvascular endothelial cells (RBMECs) exposed to interferon  $\gamma$  and tumor necrosis factor  $\alpha$  (I + T; 100 IU each) or cultured in physiological medium (Ctrl) for 6 h. \*  $p < 0.05$ .
